# Lipids of different phytoplankton groups differ in sensitivity to degradation: implications for carbon export

Jelena Godrijan<sup>1</sup>, Daniela Marić Pfannkuchen<sup>2</sup>, Tamara Djakovac<sup>2</sup>, Sanja Frka<sup>1</sup>,  
Blaženka Gašparović<sup>1\*</sup>

<sup>1</sup>Division for Marine and Environmental Research, Ruđer Bošković Institute, POB 180, HR–10002 Zagreb, Croatia

<sup>2</sup>Center for Marine Research (CMR), Ruđer Bošković Institute, G. Paliaga 5, 52210 Rovinj, Croatia

\*Correspondence:

Blaženka Gašparović, Division for Marine and Environmental Research, Ruđer Bošković Institute, Croatia. Email: [gaspar@irb.hr](mailto:gaspar@irb.hr)

**Running Title:** Lipids of different phytoplankton

## Abstract

The future of life on Earth depends on how the ocean might change, as it plays an important role in mitigating the effects of global warming. The main role is played by phytoplankton. Not only are phytoplankton the base of the oceans' food web, but they also play an important role in the biological carbon pump (BCP), the process of forming organic matter (OM) and transporting it to the deep sea, representing a sink of atmospheric CO<sub>2</sub>. Lipids are considered important vectors for carbon sequestration. A change in the phytoplankton community composition as a result of ocean warming is expected to affect the BCP. Many predictions indicate a dominance of small at the expense of large phytoplankton. To gain insight into interplay between the phytoplankton community structure, lipid production and degradation and adverse environmental conditions, we analyzed phytoplankton composition, POC and its lipid fraction in the northern Adriatic over a period from winter to summer at seven stations with a gradient of trophic conditions. We found that at high salinity and low nutrient content, where nanophytoplankton prevailed over diatoms, the newly fixed carbon is substantially directed toward the synthesis of lipids. Lipids produced by nanophytoplankton, coccolithophores and phytoflagellates, are more resistant to degradation than those produced by diatoms. This suggests a more successful lipid carbon sink of nanophytoplankton and thus a negative feedback on global warming. The difference in lipid degradability is discussed as a difference in the size of the cell phycosphere. We hypothesize that the lipids of nanophytoplankton are less degradable due to the small phycosphere with a poorer bacterial

37 community and consequently a lower lipid degradation rate compared to diatoms. The chemical  
38 composition of the lipids of the different phytoplankton groups could have a different  
39 susceptibility to degradation, which could also contribute to the differences in lipid  
40 degradability.

41

42 **KEYWORDS**

43 Coccolithophores, diatoms, nanoplankton, lipid degradability, lipid carbon sink

## 44 **1 INTRODUCTION**

45 The ocean is important for the global carbon budget (Friedlingstein et al., 2022). It regulates  
46 atmospheric CO<sub>2</sub> concentrations and is estimated to absorb 25% of annual anthropogenic  
47 carbon emissions (Heinze et al., 2015). The ocean carbon budget consists of inorganic and  
48 organic pools distributed between the particulate and dissolved fraction. The organic pool  
49 originates primarily from autochthonous sources and secondarily allochthonous sources  
50 (Lønborg et al., 2020). Autochthonous organic matter (OM) is produced by phytoplankton  
51 through photosynthesis from dissolved CO<sub>2</sub> in a process known as primary production (PP).  
52 The produced OM is transferred downward through the ocean by the action of the biological  
53 carbon pump (BCP), mediated by either biological or physical processes (Claustre et al., 2021).  
54 The BCP sequesters carbon for weeks to hundreds or even millions of years (DeVries et al.,  
55 2012). How efficiently the BCP sequesters carbon at ocean depth depends in large part on the  
56 fraction of primary production exported below the euphotic zone (Buesseler and Boyd, 2009).  
57 The major factors determining BCP efficiency are particulate OM flux, net PP, food web  
58 controls, ballast, temperature, oxygen content, and degradation rates (Buesseler et al., 2020).  
59 Most of the OM is already removed or partially degraded in the surface layers of the ocean by  
60 the action of bacteria (Azam et al., 1983). However, it is important to emphasize that the lability  
61 of OM is one of the key factors determining the residence time of OM in the ocean (Cabrera-  
62 Brufau et al., 2021, Moran et al., 2021).

63 As a result of global change, the oceans' PP is declining (2.1% decline per decade)  
64 (Gregg and Rousseaux, 2019). Phytoplankton play a key role in global PP, major  
65 biogeochemical cycles, and form the basis of the food chain in aquatic environments. The  
66 succession of dominant life-forms in phytoplankton is shaped by a complex interplay of many  
67 factors, including nutrient and light availability, temperature, and turbulence (Barbosa et al.,  
68 2010). Among the major phytoplankton groups, coccolithophores and diatoms with calcified

69 and silicified cell walls, respectively, have global ecological significance, including the role  
70 they play in the global carbon cycle through the production and export of inorganic and organic  
71 carbon to the ocean depths (O'Brien et al., 2013; Gregg and Rousseaux, 2019). Global change  
72 is affecting phytoplankton biomass, primary productivity, and carbon export. It is evident that  
73 diatom abundance has declined significantly in many regions of the world's oceans (Mishra et  
74 al., 2022), while the abundance of coccolithophores in the North Atlantic has increased in the  
75 past 50 years (Rivero-Calle et al., 2015). Observed changes in phytoplankton, including  
76 abundance (Boyce et al., 2010) and community structure (Marinov et al., 2010), are expected  
77 to have a cascading influence on primary and export production, food web dynamics, and  
78 marine food web structure (Chust et al., 2014).

79 Phytoplankton are the most important source of biogenic lipids in the ocean (Gašparović  
80 et al., 2014). The content and composition of biosynthesized lipids depend on environmental  
81 factors (Guschina and Harwood, 2009). Lipids are rich in carbon and are one of the major  
82 biochemicals in the ocean. Lipids with saturated acyl chain are shown to be selectively  
83 preserved in the water column, making them an important vector for carbon sequestration and  
84 potentially important factors in the efficiency of the BCP (Gašparović et al., 2016). Early  
85 diagenetic changes affect the chemical stability of lipids and their longevity in the water column  
86 (Brassell, 1993). Nonselective preservation of lipids could be enabled by physical protection  
87 through their association with minerals, such as diatom's siliceous frustules and calcite  
88 coccoliths of coccolithophores (Hedges et al., 2001). In the water column, lipids are subjected  
89 to biotic (enzymatic peroxidation, biohydrogenation (Rontani and Koblížek, 2008)), and abiotic  
90 (photooxidation, autoxidation) (Rontani, 2008) breakdown processes. While autoxidation and  
91 biotransformation may take place throughout the water column, photooxidation may play a  
92 significant role in the euphotic layer (Rontani et al., 2009). While abiotic degradation  
93 predominated in the suspended particle pool, biotic (heterotrophic) degradation was significant  
94 for sinking particles and increased with depth (Christodoulou et al. 2009).

95 Influence of global warming on the ocean is not only seen through the increase in its  
96 temperature, but also through a number of indirect changes including: oligotrophication of the  
97 upper water column due to increased ocean stratification that reduces water column mixing,  
98 reduced CO<sub>2</sub> solubility, ocean acidification, deoxygenation, and a reduction in thermohaline  
99 circulation (IPCC, 2021). Under increasingly nutrient-depleted conditions, smaller  
100 phytoplankton is favored at the expense of larger diatoms (Bopp et al., 2005). To gain insight  
101 into the interplay between phytoplankton structure, biogenic lipid production and degradation,  
102 and environmental conditions, we analyzed phytoplankton and lipid production in the northern

103 Adriatic along the transect of a well-defined trophic gradient from winter to summer. We  
104 hypothesized that lipids of different phytoplankton groups differ in their susceptibility to  
105 degradation. We also hypothesize that lipids that are more resistant to degradation may  
106 contribute positively to the BCP.

## 107 2 MATERIALS AND METHODS

### 108 2.1 Sampling and parameter analyses

109 Data were collected on seven cruises on a monthly basis from February to August in 2010.  
110 Seven stations were sampled throughout the northern Adriatic, from the transect between  
111 Rovinj and the Po River delta, covering hydrodynamically and trophically distinct regions  
112 (Figure 1). Water samples were collected with 5 L Niskin bottles at the surface (0.5 m depth).

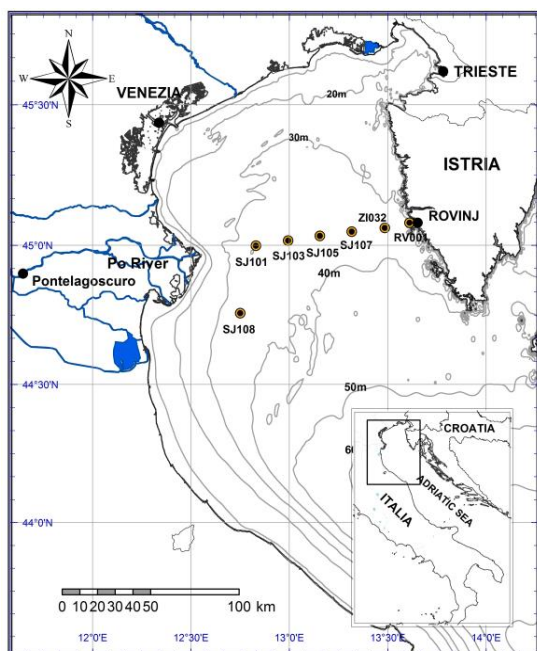

113  
114 FIGURE 1 Map of sampling stations in the northern Adriatic Sea.

115  
116 A CTD probe (Seabird SBE25, Sea-Bird Electronics Inc., Bellevue, Washington, USA)  
117 was used to measure temperature and salinity. Total phosphorus, dissolved inorganic  
118 orthophosphates ( $\text{PO}_4^{3-}$ ), total inorganic nitrogen (TIN), including nitrates ( $\text{NO}_3^-$ ), nitrites  
119 ( $\text{NO}_2^-$ ), and ammonium ( $\text{NH}_4^+$ ), were determined by spectrophotometric methods (Parsons et  
120 al., 1984) on board and immediately after sampling using Shimadzu UV-Mini 1240  
121 spectrophotometer with 10 cm quartz cuvettes. Organic phosphorus concentration was  
122 calculated as the difference between total and inorganic phosphorus concentrations.  
123 Subsamples for the determination of chlorophyll *a* (Chl *a*) were filtered on Whatman GF/C

124 filters and stored frozen at  $-20^{\circ}\text{C}$  until further processing. Chl *a* concentrations were determined  
125 following 3 h extraction in 90% acetone (in the dark, with grinding), on a Turner TD-700  
126 fluorimeter (Parsons et al., 1984).

## 127 **2.2 Phytoplankton**

128 We preserved 200 mL of seawater with 2% neutralized formaldehyde (final concentration) and  
129 performed nano- and microphytoplankton determination and enumeration within one month of  
130 sampling. The stored sample was homogenized by gentle shaking, and a subsample was added  
131 to the Utermöhl sedimentation chamber (volume: 50 mL; Hydro-Bios Apparatebau, Altenholz,  
132 Germany), where it settled for ~30 h. We performed the analysis on a Zeiss Axiovert 200 (Zeiss,  
133 Jena, Germany) following the inverted microscope method (Utermöhl, 1958, Hasle 1978). Total  
134 phytoplankton included all species counted in the microphytoplankton (20–200  $\mu\text{m}$ ) and  
135 nanophytoplankton (2–20  $\mu\text{m}$ ) groups (Sieburth et al., 1978). Identified taxa were grouped to  
136 diatoms, dinoflagellates, and nanophytoplankton coccolithophores and phytoflagellates (which  
137 included chlorophytes, chrysophytes, cryptophytes and prasinophytes) according to Tomas  
138 (1997).

## 139 **2.3 Particulate organic carbon (POC)**

140 For POC determination, 1 L of seawater was filtered on board through 0.7  $\mu\text{m}$  Whatman GF/F  
141 filters precombusted at  $450^{\circ}\text{C}/5\text{h}$ . After filtration, the filters were rinsed with Milli-Q water to  
142 remove salts and stored in liquid nitrogen on board and at  $-80^{\circ}\text{C}$  in the laboratory until analysis.  
143 POC was analyzed using an SSM-5000A solid sample module connected to a Shimadzu TOC-  
144  $V_{\text{CPH}}$  carbon analyzer calibrated with glucose (Sugimura and Suzuki, 1988). POC  
145 concentrations were corrected based on filter blank measurements. The average filter blank  
146 value including the instrument blank value corresponded to  $5 \mu\text{g C L}^{-1}$ . The reproducibility  
147 obtained for the glucose standard was 3%.

## 148 **2.4 Lipids**

149 For particulate lipid analysis, we collected 3 L of seawater prefiltered through a 200  $\mu\text{m}$   
150 stainless steel screen to remove larger particles including microzooplankton. Lipids were  
151 collected on through precombusted ( $450^{\circ}\text{C}/5\text{h}$ ) 47 mm GF/F filters and stored in liquid nitrogen  
152 until lipid extraction. It was performed using a modified one-phase solvent mixture of  
153 dichloromethane-methanol-water procedure (Bligh and Dyer, 1959; Vrana et al., 2022). In  
154 short, in order to assess recoveries in later stages of sample analysis we added 5  $\mu\text{g}$  of standard

155 methyl stearate to the sliced filters together with 10 mL of a one-phase solvent mixture  
156 (dichloromethane/methanol/deionized water (1:2:0.8 v/v/v)). This was then subjected to an  
157 ultrasonic treatment for three minutes and stored overnight in the refrigerator, afterwards we  
158 filtered the extracts through a sinter funnel into a separatory funnel, washed once with a the  
159 one-phase solvent mixture, once with dichloromethane and 0.73% NaCl (1:1 v/v), and once  
160 with dichloromethane. The extracts were concentrated by rotary evaporation under a nitrogen  
161 atmosphere and kept at -20 °C until measurements were made. To prepare the lipid extracts for  
162 analysis, the dichloromethane extracts were evaporated to dryness under nitrogen flow and then  
163 dissolved in 20 µL dichloromethane prior to analysis.

164 Lipid classes were separated on Chromarods SIII and quantified with external  
165 calibration using a mixture of standard lipids by a thin-layer chromatograph-flame ionization  
166 detector (TLC-FID) Iatrosan Mark-VI (Iatron), using a hydrogen flow of 160 mL min<sup>-1</sup> and an  
167 air flow of 2000 mL min<sup>-1</sup>. This method identify eighteen lipid classes: hydrocarbons (HC),  
168 steryl esters (SE), fatty acid methyl esters (ME), fatty ketone (KET), triacylglycerols (TG), free  
169 fatty acids (FFA), fatty alcohols (ALC), 1,3-diacylglycerols (1,3DG), sterols (ST), 1,2-  
170 diacylglycerols (1,2DG), pigments (PIG), monoacylglycerols (MG), three glycolipids (GL)  
171 including monogalactosyl-, digalactosyl-, and sulfoquinovosyl- diacylglycerol (MGDG,  
172 DGDG, and SQDG, respectively), and three phospholipids (PL) (phosphatidylglycerols (PG),  
173 phosphatidylethanolamines (PE), and phosphatidylcholines (PC)). Total lipid concentration is  
174 calculated by summing all detected classes. Full details can be found in Gašparović et al. (2015;  
175 2017). In this article we focused on lipid degradation indices trough the lipolysis index (Goutx  
176 et al., 2003), which characterize the degree of lipid degradation in seawater. Lipolysis index is  
177 calculated as the ratio of the sum of lipid degradation indices (ALC+FFA+MG+DG) to the sum  
178 of cell lipids TG, WE, and glyco- and phospho-lipids (Goutx et al., 2003).

179

## 180 **2.5 Data analysis**

181 Linear and polynomial fits (Origin 7 computer software, Origin Lab) were performed to  
182 examine the correlation between salinity and major nutrient distributions, major phytoplankton  
183 groups developed, and lipid production in the northern Adriatic Sea.

184 To investigate correlations between major phytoplankton groups developed under  
185 different environmental conditions (salinity (S), temperature (T), major nutrients) and total  
186 organic matter (POC) and lipid production Principal component analysis was carried out using

187 Statistica software. Schematic representation was drawn using symbols courtesy of the  
188 Integration and Application Network, University of Maryland Center for Environmental  
189 Science ([ian.umces.edu/symbols/](http://ian.umces.edu/symbols/)).

190

## 191 **3 RESULTS**

### 192 **3.1 Environmental conditions**

193 Sea surface salinity increased from stations in the Po River plume influence area on the western  
194 side of the northern Adriatic (stations SJ108, SJ101, SJ103) to the eastern side (stations SJ105,  
195 SJ107, ZI032 and RV001) ([Figure 2a](#)). The variability of sea surface temperature and salinity  
196 showed similar patterns. From winter to summer, water freshening occurred in parallel with the  
197 temperature increase ([Figure 2b](#)). Exceptions were observed during the March, May, and June  
198 at stations SJ108, SJ101, and SJ103, when colder river water mixed with warmer seawater. The  
199 decrease in salinity resulted in a substantial increase in inorganic nutrients, TIN ([Figure 2c](#)) and  
200  $\text{PO}_4^{3-}$  ([Figure 2d](#)), along with an increased ratio of TIN and total phosphorus (TIN/ $\text{P}_{\text{tot}}$ ) ([Figure](#)  
201 [2f](#)). Total phosphorus rather than  $\text{PO}_4^{3-}$  was used for the calculation of TIN/ $\text{P}_{\text{tot}}$  because organic  
202 phosphorus ([Figure 2e](#)) is an important source of phosphorus for phytoplankton in the northern  
203 Adriatic (Ivančić et al., 2012). The data used to create Figure 2 can be found in Table S1.

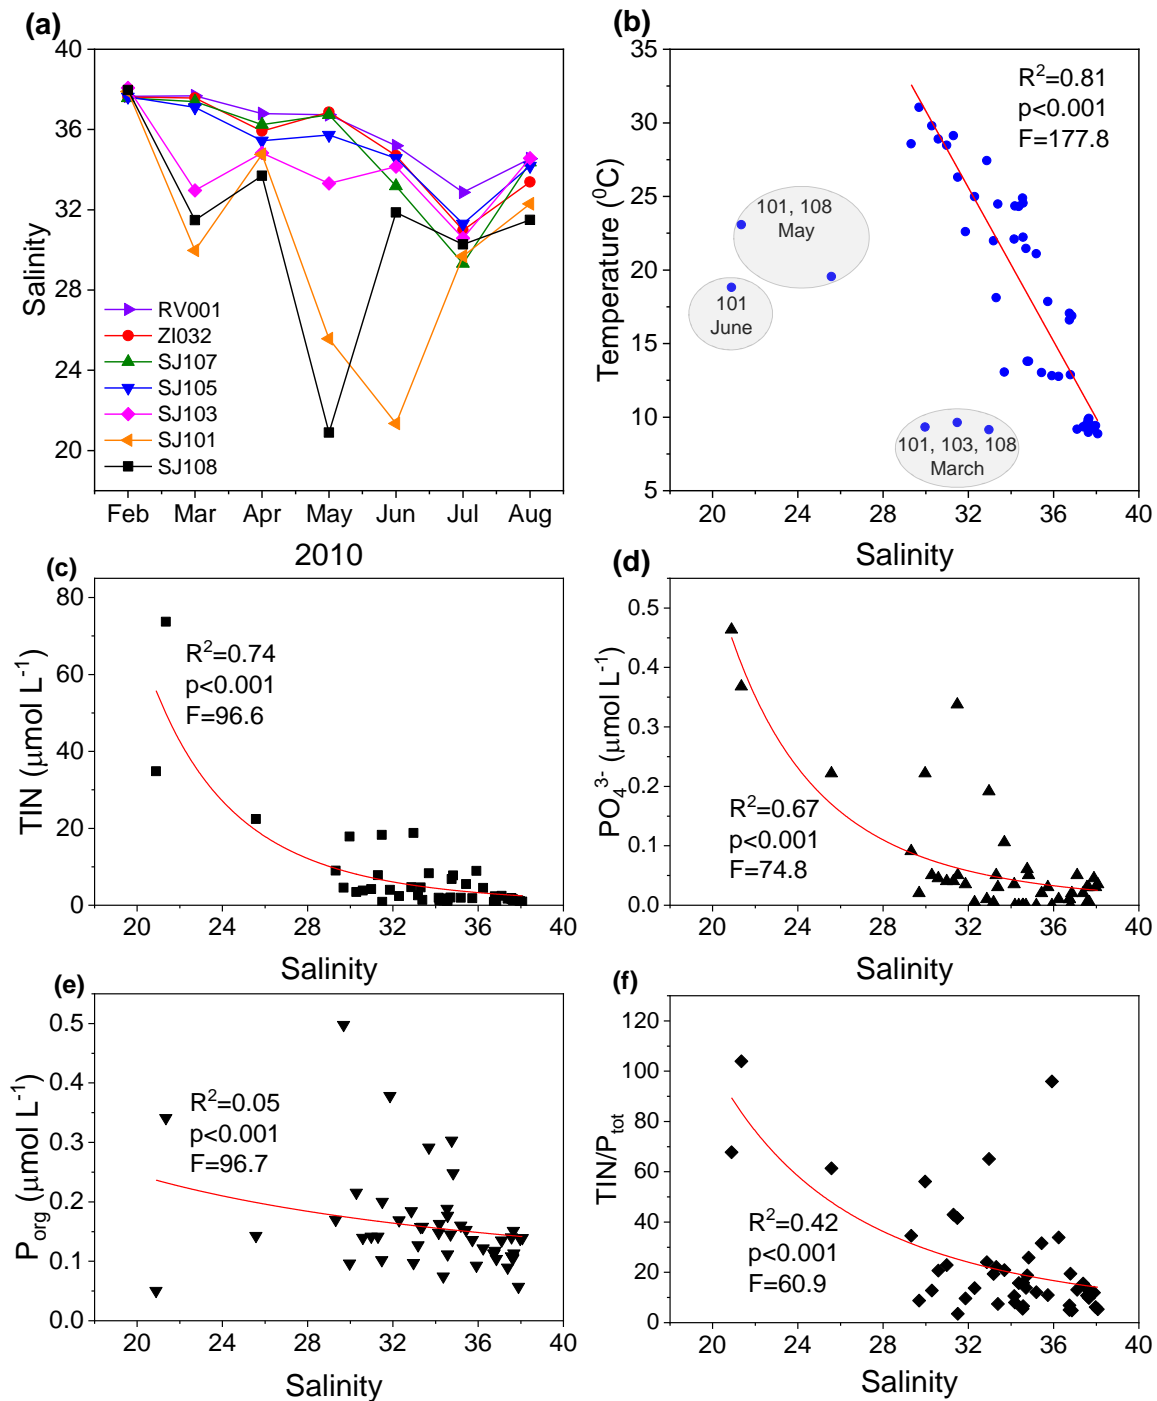

204  
 205 **FIGURE 2** Relationship between salinity and other environmental parameters. Temporal  
 206 salinity variations (A), relationships between salinity and temperature (B), TIN concentration  
 207 (C),  $\text{PO}_4^{3-}$  (D), organic phosphorus (E) concentrations and  $\text{TIN}/\text{P}_{\text{tot}}$  ratio (F) in the period from  
 208 February to August 2010 at seven stations in the northern Adriatic. Note that linear fit in (b) is  
 209 made without outliers separated by circles.

### 210 3.2 Phytoplankton succession

211 Phytoplankton community structure varied with salinity and time (Figures 3 and 4, Figure S1,  
 212 Table S1), indirectly indicating a dependence of different phytoplankton groups on nutrient  
 213 availability. Diatoms thrived at the lowest observed salinities (Figure 3a) and were associated



214 with an increase in temperature (Figure 4). Coccolithophores thrived under conditions of high  
215 salinity (Figures 3b and 4) characterized by low temperatures (Figure 2b) and low nutrient  
216 availability (Figures 2d-e). On the spatio-temporal scale, phytoflagellates in the nano fraction  
217 found their niche for development at intermediate salinities (around 31-37), mainly at  
218 oligotrophic stations and from February to August (Figures 3c and 4, Figure S1).  
219 Dinoflagellates were abundant mainly in May and June (Figure 4, Figure S1) at intermediate  
220 salinities 30-36.5 (Figure 3d). The temporal succession of dominant phytoplankton groups is  
221 shown in Table 1.

222 In the PCA analysis (Figure 3f, Table S2), PC1 and PC2 explained 70.06% of the  
223 variances and revealed positive relationship between high salinity and increase in  
224 coccolithophore proportion to the total phytoplankton (%cocco) and the relative content of  
225 particulate lipids in POC (Lipid<sub>p</sub>/POC (%)). On the other hand, the contribution of diatoms to  
226 the total phytoplankton (%diato) is clustered with the inorganic nutrients, TIN and PO<sub>4</sub><sup>3-</sup>. PC1  
227 clearly distinguishes these two clusters.

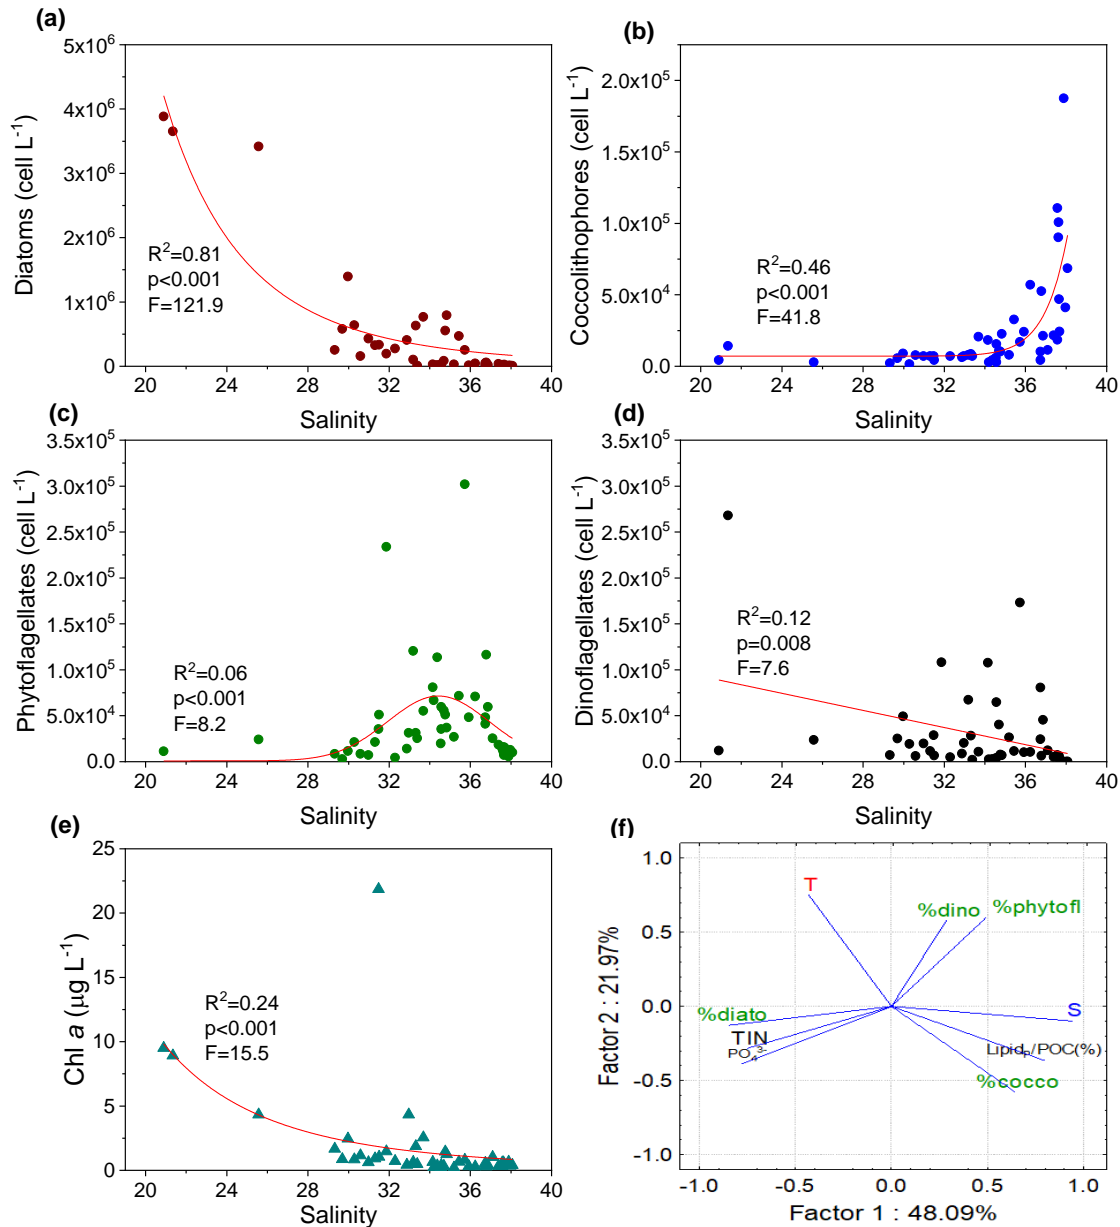

228

229 FIGURE 3 Relationship between salinity and abundance of micro diatoms (A),  
 230 coccolithophores (B), phytoflagellates (C), dinoflagellates (D), Chl *a* (E). Biplot of scores of  
 231 the contribution of major phytoplankton groups (% diatoms, coccolithophores,  
 232 phytoflagellates, and dinoflagellates), the relative content of particulate lipids in POC  
 233 (Lipid<sub>p</sub>/POC (%)) and environmental factors (T - temperature, S - salinity, TIN - total inorganic  
 234 nitrogen and PO<sub>4</sub><sup>3-</sup> - orthophosphates) from the results of principal component analysis (F).

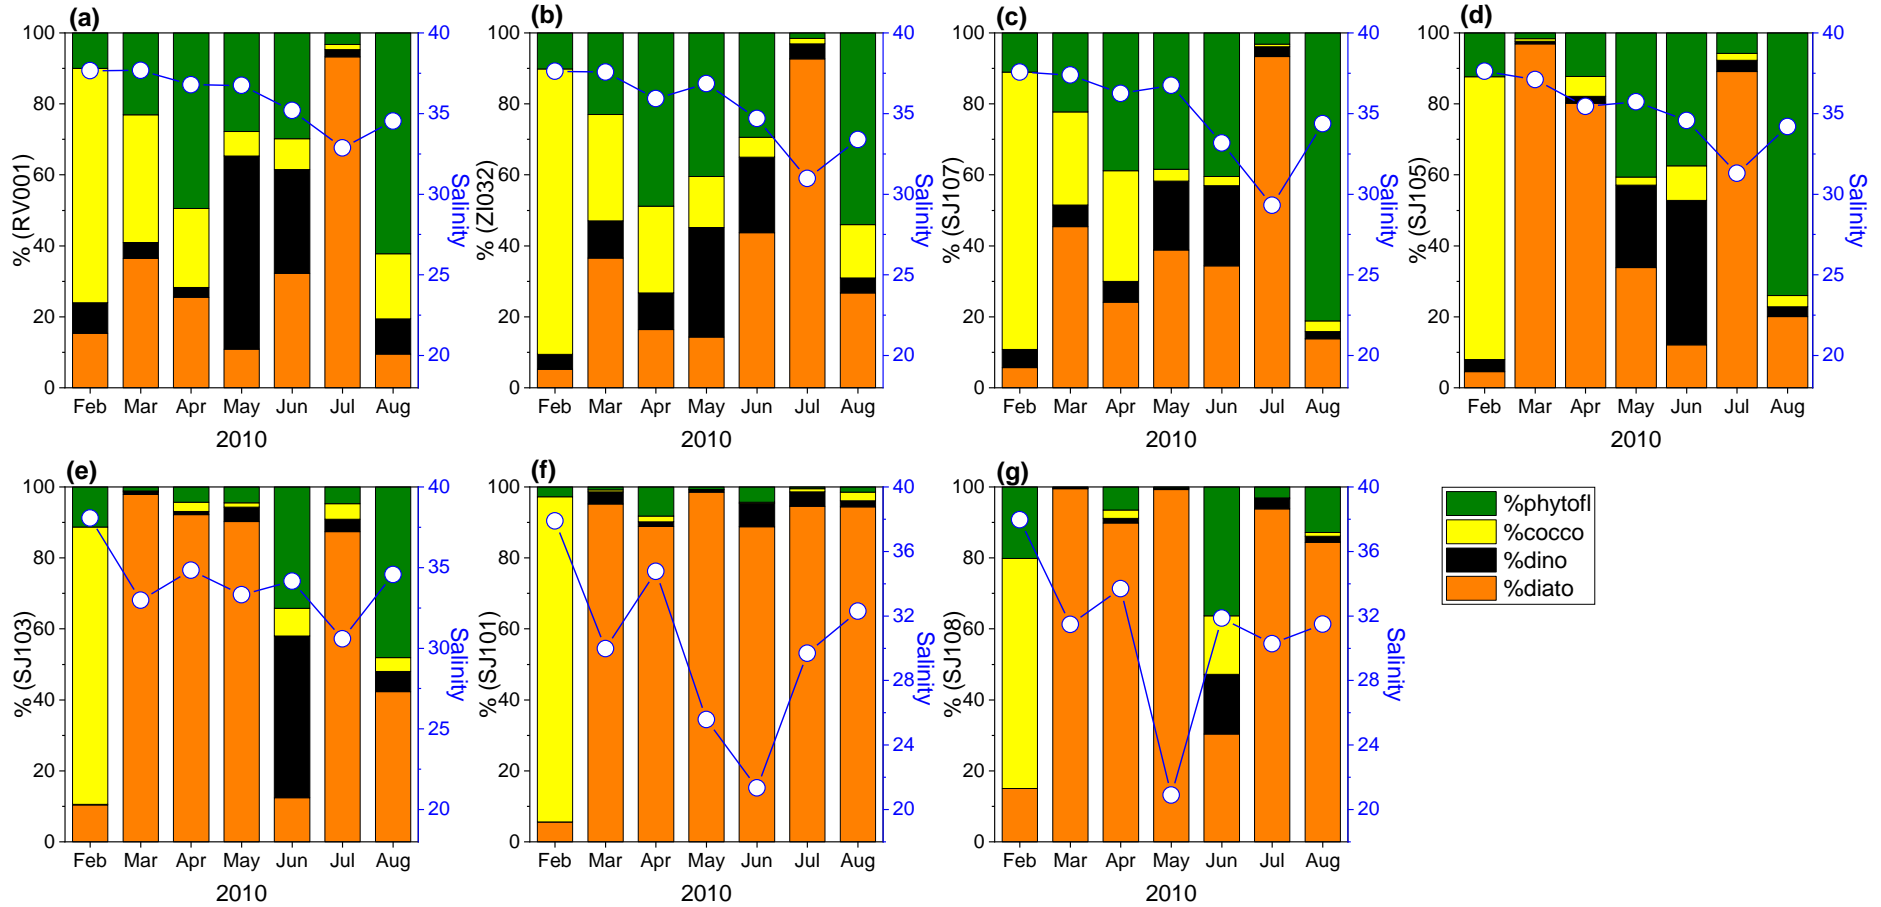

235

236 FIGURE 4 Phytoplankton community structure (bars, % of total community obtained by microscopic identification and counting of the cells)  
 237 for the period February to August in the surface waters (0.5 m depth) of the northern Adriatic Sea at stations RV001 (a), ZI032 (b), SJ107 (c),  
 238 SJ105 (d), SJ103 (e), SJ101 (f) and SJ108 (g). Temporal salinity variations (right y-axis) are shown for each station with lines and symbols.

239 Table 1. Temporal succession of the dominant phytoplankton group(s) and environmental data (salinity and Chl *a*) for the seven cruises  
 240 conducted in the northern Adriatic Sea from February to August 2010.  
 241

| Date        | Stations        | Dominant phytoplankton group(s)                                                                    | Chl <i>a</i> ±SD<br>(µg/L) | Average<br>salinity±SD |
|-------------|-----------------|----------------------------------------------------------------------------------------------------|----------------------------|------------------------|
| 15.02.2010  | All             | Coccolithophores                                                                                   | 0.51±0.12                  | 37.77±0.20             |
| 17.03. 2010 | RV001-SJ107     | Mixed, mainly nanophytoplankton<br>with significant proportion of<br>coccolithophores (26.2–35.9%) | 0.36±0.05                  | 37.55±0.15             |
|             | SJ105-SJ108     | Diatoms                                                                                            | 2.61±9.72                  | 33.35±3.07             |
| 15.04. 2010 | RV001-SJ107     | Mixed, mainly nanophytoplankton<br>with significant proportion of<br>coccolithophores (22.3–31.2%) | 0.30±0.02                  | 36.32±0.44             |
|             | SJ105-SJ108     | Diatoms                                                                                            | 1.48±0.79                  | 34.68±0.73             |
| 17.05. 2010 | RV001-SJ105     | Mixed, mainly nanophytoplankton                                                                    | 0.54±0.20                  | 36.52±0.53             |
|             | SJ103-SJ108     | Diatoms                                                                                            | 5.24±3.90                  | 26.59±6.27             |
| 24.06. 2010 | SJ108-RV001     | Mixed, mainly nanophytoplankton                                                                    | 1.80±3.16                  | 33.94±1.22             |
|             | SJ101           | Diatoms                                                                                            | 5.19±5.26                  | 21.35±0.00             |
| 15.07. 2010 | All             | Diatoms                                                                                            | 0.93±0.66                  | 30.72±1.78             |
| 19.08. 2010 | RV001-SJ103     | Mixed, mainly nanophytoplankton                                                                    | 0.29±0.15                  | 34.21±0.63             |
|             | SJ101 and SJ108 | Diatoms                                                                                            | 0.88±0.23                  | 31.90±0.56             |

242

### 243 3.3 Lipid production and degradation

244 In parallel with Chl *a* (Figure 3e), high OM content characterized low salinity samples,  
245 including POC (Figure 5a) and particulate lipid content (Figure 5b). Conversely, the relative  
246 content of particulate lipids in POC (Lipid<sub>P</sub>/POC (%)) increased significantly in high salinity  
247 waters (Figure 5c), characterized by low POC (Figure 5a) and high percentage of  
248 coccolithophores (Figure 3b). The data used to create Figure 5 can be found in Table S1.

249

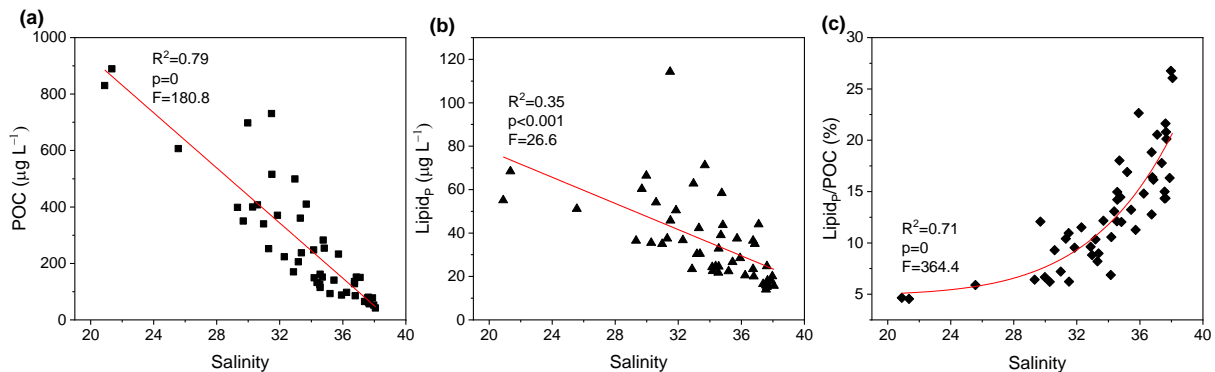

250

251 FIGURE 5 Relationships between salinity and POC (a), particulate lipid concentration (b),  
252 the relative content of particulate lipids in POC (c).

253

254 For the stations and time periods where the total population consisted of  
255 coccolithophores or a mixed population, composed mainly of nanophytoplankton, a much  
256 higher lipid content per Chl *a* was observed, 157–417 pg lipid/Chl *a* than in the cases where the  
257 total population was dominated by diatoms, 21–120 pg lipid/ Chl *a* (Figure 6a). The correlation  
258 of Lipid<sub>P</sub>/POC (%) with major phytoplankton groups indicated smaller Lipid<sub>P</sub>/POC (%) when  
259 diatoms were abundant and, conversely, higher lipid<sub>P</sub>/POC (%) when coccolithophores were  
260 abundant.

261 The total particulate lipid fraction analyzed also contained lipids from  
262 microzooplankton, whose carbon yield in the northern Adriatic POC is orders of magnitude  
263 lower than that of phytoplankton (Kamburska and Fonda-Umani, 2009) as well as from the  
264 bacterial community, but their contribution to total lipids is considered to be neglected. The  
265 contribution of bacterial carbon to POC is generally low, ranging from 1-17% in the northern  
266 Adriatic (La Ferla et al., 2005) and 1-2% in the North Atlantic (Gašparović et al., 2014). At the  
267 same time, the lipid carbon of marine bacteria is low and ranges from 1.7 to 7.3% of the POC  
268 (Goutx et al., 1990). Lipids may have also partially originated from the non-living OM, which  
269 could have contributed significantly to the POC and lipid pool of the phytoplankton growing  
270 under stress conditions (Flanjak et al., 2022).

271 An index to characterize the degree of lipid degradation in natural seawater and OM  
272 freshness is the lipolysis index (LI) (Goutx et al., 2003). Higher LI values indicate a higher  
273 degree of lipid degradation. Higher LI values were determined for stations and time periods  
274 characterized by the dominance of diatoms (LI=0.40–1.57) with respect to the dominance of  
275 coccolithophores or mixed, mainly nanophytoplankton population (LI=0.35–0.66) (Figure 6b).

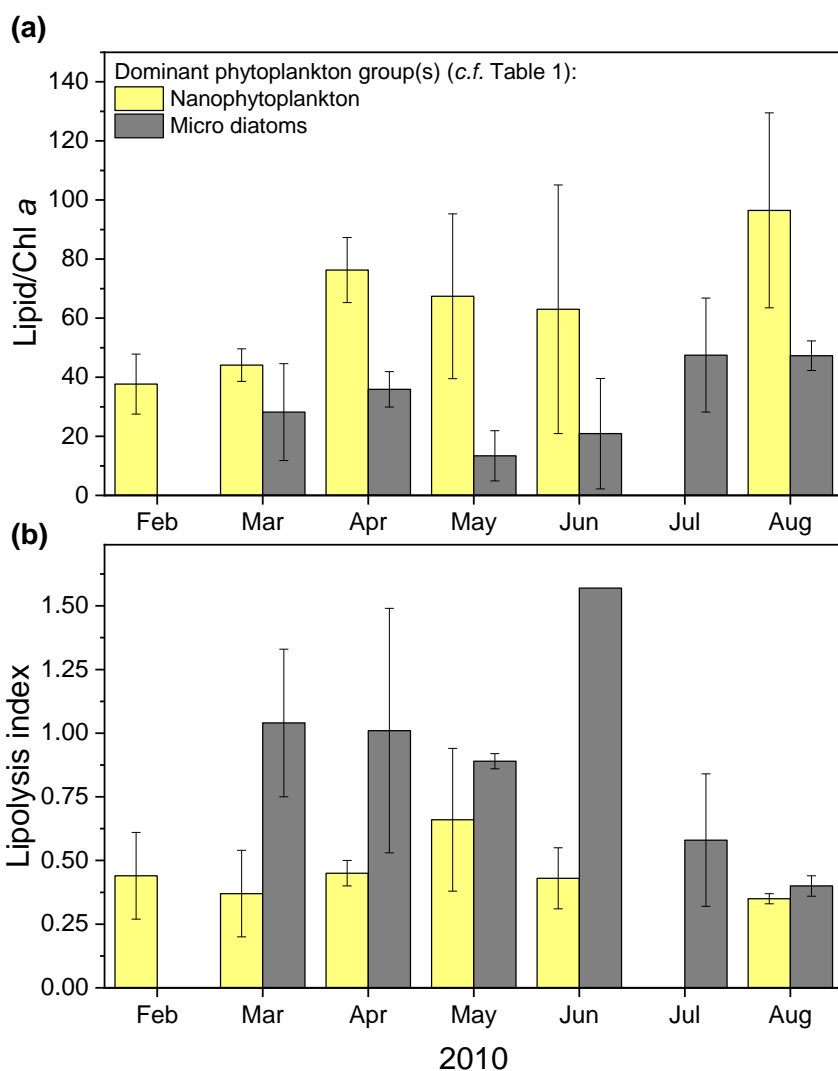

276

277 FIGURE 6 Lipid production (Lipid/Chl *a*) and degradation (Lipolysis index (LI)) in the  
278 period from February to August 2010 in the northern Adriatic Sea.

## 279 4 DISCUSSION

### 280 4.1 Different sensitivity to decomposition of lipids of different phytoplankton groups

281 We found that under conditions of high salinity and low inorganic nutrient content  
282 (oligotrophic area), nanophytoplankton prevailed over microphytoplankton, and the newly  
283 fixed carbon appeared to be substantially directed toward the synthesis of lipids, as indicated

284 by the high relative content of particulate lipids in POC (> 15%, [Figure 5c](#)) and the high lipid  
285 content per Chl *a* ([Figure 6a](#)). In contrast, excess nutrients at low salinity (mesotrophic area)  
286 promoted diatom blooms ([Figure 3a](#)), which synthesized more lipids, but the relative content of  
287 particulate lipids in POC (< 5%) and the lipid content per Chl *a* ([Table 1](#)) are low. These results  
288 suggest that diatom cell growing in nutrient abundant conditions have a low requirement for  
289 lipids as structural components of membranes, signal transduction, and energy storage.

290         Given that the total amount of lipids is higher during diatom blooms, the question is  
291 whether this necessarily means that diatoms (rich in OM) are more significant vectors of lipid  
292 carbon removal to the ocean depths in comparison to nanophytoplankton? We can also ask  
293 whether lipids produced by nanophytoplankton, coccolithophores and phytoflagellates, and  
294 diatoms have a different tendency to degrade. In addition to the many factors that influence the  
295 efficiency of transfer of OM to the depth, lower degradation likely favors longer residence time  
296 in the water column and most likely better efficiency of carbon sequestration.

297         The lower values of Lipolysis index under conditions in which coccolithophores  
298 pervaded or contributed significantly to the total population ([Figure 6b](#)) indicate that lipids  
299 produced by nanophytoplankton are more resistant to degradation than those produced by  
300 diatoms. This suggests that a greater proportion of nanophytoplankton lipids can be transported  
301 to depth than those produced by diatoms. One explanation for the difference in lipid stability  
302 between these phytoplankton groups could be the size of the cell phycosphere harboring a  
303 variety of bacterial species (Seymour et al., [2017](#)). The size of the phycosphere is closely related  
304 to the phytoplankton cell size with the phycosphere radius of diatoms being one to five orders  
305 of magnitude larger than that of nanophytoplankton (Seymour et al., [2017](#)), suggesting a much  
306 richer bacterial community hosted by the phycosphere of diatoms and, accordingly, more  
307 intense lipid degradation upon cell death.

308         The difference in lipid stability between phytoplankton groups could be also due to  
309 difference in lipid chemical composition, which affects the different susceptibility to  
310 degradation. Saturated lipids are more resistant to degradation and are therefore important  
311 carbon carriers to marine depths (Gašparović et al., [2016](#)). Accordingly, abyssal depths of the  
312 Atlantic are enriched in saturated fatty acids, saturated or monounsaturated triacylglycerols  
313 (Gašparović et al., [2016](#)). Coastal phytoplankton populations growing under N and P limitation  
314 biosynthesize saturated fatty acids, especially under P limitation (Grosse et al., [2019](#)). Shin et  
315 al. ([2003](#)) found higher production of unsaturated fatty acids (fivefold) at the East China Sea  
316 mesotrophic site, which is characterized by the dominance of diatoms. In contrast, saturated  
317 fatty acids dominated at the oligotrophic sites, while the proportion of diatoms decreased.

318 Mayzaud et al. (2014) found that in the northern Atlantic, the proportion of polyunsaturated  
319 fatty acids was much greater under mesotrophic conditions than under oligotrophic conditions.  
320 Because diatoms from our study grew under higher/er nutrient availability, i.e. lower salinity  
321 (Figure 3a) than nanophytoplankton we can assume that diatoms synthesized more unsaturated  
322 lipids that are more susceptible to degradation (abiotic photodegradation or biotic).  
323 Consequently, we found higher values of lipolysis index were estimated for samples in which  
324 diatoms predominated. Furthermore, haptophytes, especially the coccolithophorid family  
325 Gephyrocapsaceae, are rich in long-chain (C37–C39) unsaturated ethyl and methyl ketones  
326 (Sawada and Shiraiwa, 2004). These long-chain alkenones are paleomarkers for reconstructing  
327 past changes in sea surface temperatures and global climate (Brassell et al., 1986, Volkman et  
328 al., 1995) because they are well preserved in bottom sediments and have also been used to  
329 reconstruct the paleoproductivity of coccolithophores (Schulte et al., 1999). This further  
330 suggests their stability to degradation and the importance of coccolithophore lipid carbon for  
331 carbon sequestration in the ocean (Raja and Rosell-Melé, 2021).

332 We also considered whether higher temperature (with linked higher bacterial activity)  
333 is the reason for enhanced diatom lipid degradation. For example, in March, when the  
334 temperature throughout the transect was  $9.35 \pm 0.18$  °C (Table S1), the lipolysis index was low  
335 (average 0.45) at three oligotrophic stations (RV001, ZI032, and SJ107) with a significant  
336 presence of coccolithophores, indicating lower lipid degradation. In contrast, at the mesotrophic  
337 stations SJ105-SJ108, characterized by the dominance of diatoms, significantly higher lipid  
338 degradation was observed (average LI = 1.04), suggesting more intense diatom lipid  
339 degradation. Thus, the temperature effect in different degradation of lipids produced by  
340 particular phytoplankton groups could be neglected (Figure 6b).

#### 341 **4.2 Perspectives in a context of global climate change**

342 If the changes in phytoplankton community structure predicted by Bopp et al. (2005)  
343 and Gregg and Rousseaux (2019) occur in the context of climate change, lipids from  
344 coccolithophores and other nanophytoplankton could play a significant role in the process of  
345 carbon sequestration to the deep sea (Figure 6). Natural populations dominated by small  
346 flagellates and coccolithophores are often rich in lipids, as studies have shown both in model  
347 experiments (Fernández et al. 1994a, up to 60% of C in lipids) and in open ocean waters  
348 (Fernández et al., 1994b), consistent with our results. In contrast, diatoms growing under  
349 favorable nutrient and temperature conditions do not accumulate lipids (e.g., Flanjak et al.,  
350 2022), which is also consistent with our results. However, warming and lack of nutrients affect



351 the increased incorporation of carbon into lipids in diatom cells (e.g. Novak et al., 2019). The  
352 coccolithophore *Emiliania huxleyi* accumulates much more lipids in N-poor conditions (69.0  
353 pg/cell) compared to N-replete growth conditions (11.4 pg/cell) (Pantorno et al., 2013).

354 Warming generally affects reduced polyunsaturated fatty acid biosynthesis (Hixson and  
355 Arts, 2016). In diatoms, an increase in temperature leads to fatty acid shortening and a decrease  
356 in total unsaturated fatty acid content in both galactolipids (Dodson et al., 2014) and  
357 phospholipids (Vrana et al., 2022). Whereas, warming leads to a decrease in the carbon-  
358 normalised content of PUFAs in the coccolithophore *E. huxleyi* (Bi et al., 2020). Lower lipid  
359 saturation would result in lower susceptibility to degradation, resulting in better export of lipid  
360 carbon to the ocean interior. The lower lipid degradability has a positive effect on BCP, as its  
361 efficacy is also determined by the rate of OM/lipid degradation (Buesseler et al., 2020).

362 Lipids are generally discussed to be buoyant and as such do not settle but remain in the  
363 water column. However, due to their surface-active properties, they escape from the water and  
364 attach to the sinking particles, thus contributing to carbon sequestration (Novak et al., 2018).

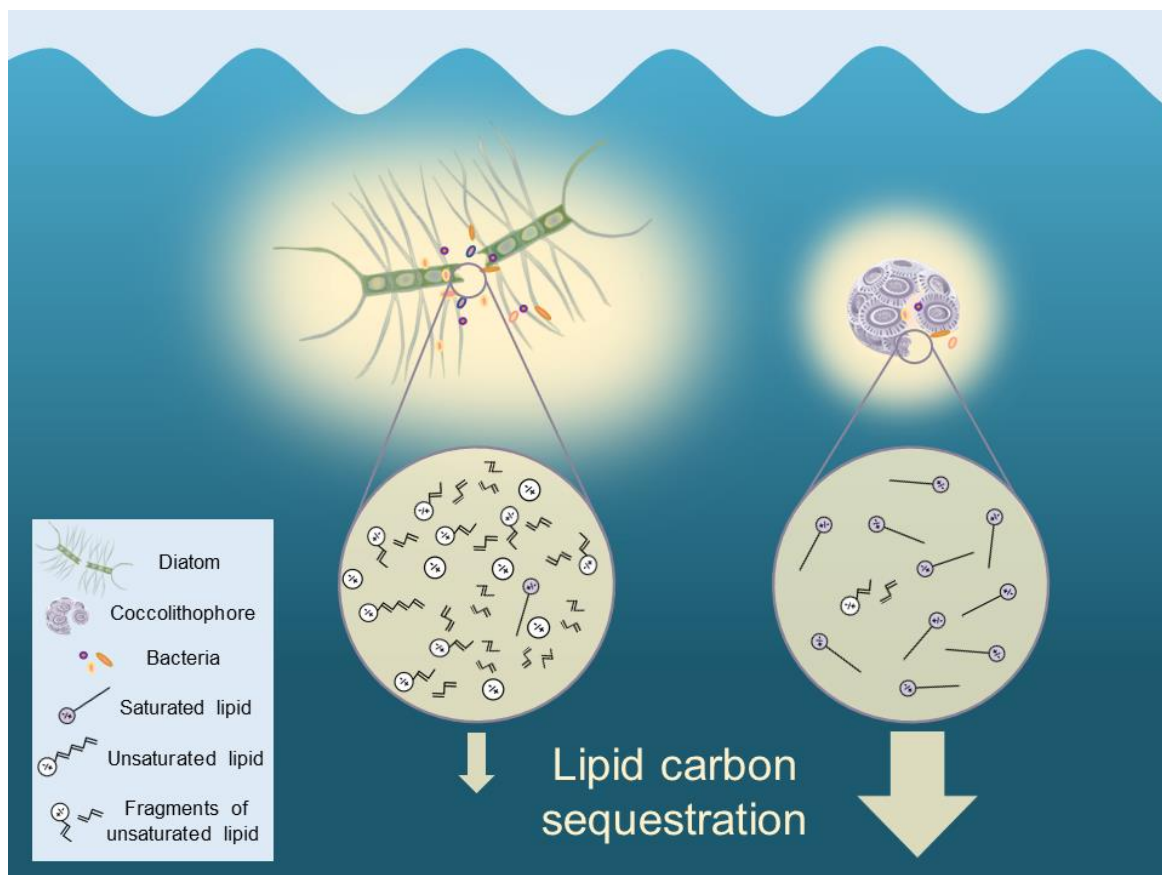

365  
366 **FIGURE 7** Schematic representation of the interplay between diatom and coccolithophore  
367 (representative of nanophytoplankton) phycospheres, lipid composition and degradability, and  
368 relationship to carbon sequestration efficiency.

369

370 Other predictions also suggest a positive effect of coccolithophores on BCP compared  
371 to diatoms. Even though the modelling study of the distribution of the diatom *Chaetoceros*  
372 *diadema* and the coccolithophore *E. huxleyi* in the ocean predicts their future decline (Jensen et  
373 al., 2017), they also note that the probability of *C. diadema* settling below 1000 m would  
374 decrease significantly, while the abundance of *E. huxleyi* at these depths would not change  
375 significantly from current conditions. In addition, a recent study using new and historical data  
376 has shown that *E. huxleyi* was found not affected by high temperatures during ‘hot summers’  
377 and its abundance increases as the warming trend continues, indicating its ability to thrive and  
378 adapt to ocean warming (Frada et al., 2021). Nutrient limiting conditions may have a positive  
379 effect on the sinking rate of coccolithophores. The coccolithophore *Gephyrocapsa oceanica* has  
380 a higher sinking rate associated with higher calcification for growth under N-limited conditions  
381 (Jiang et al., 2022). Moreover, *E. huxleyi* from the stationary growth phase that grew under N-  
382 limitation was also found to sink faster compared to growth under N-rich conditions (Pantorno  
383 et al., 2013). Lastly, Wang et al. (2022) reported that P-limitation might promote sinking of *E.*  
384 *huxleyi*.

385 In summary, our results suggest that diatoms (rich in OM) are probably not more  
386 significant vectors of lipid carbon removal to the deep ocean compared to nanophytoplankton.  
387 If nanophytoplankton predominate over diatoms in the future oceans, the carbon sink via lipids  
388 will be higher than expected based only on the lower carbon content in nanophytoplankton cells  
389 compared to diatoms (Figure 7) for at least two reasons: 1) nanophytoplankton synthesize  
390 relatively more lipids than larger diatoms, and 2) the lipids of nanophytoplankton are much less  
391 susceptible to degradation than those of diatoms and therefore can remain in the water column  
392 longer, be transferred deeper and potentially be stored in oceanic sediments. In such an  
393 environment, the lipid carbon may be preserved for millions of years.

394

## 395 AUTHOR CONTRIBUTIONS

396 JG and BG conceived of and designed the study. JG, SF, DMP and TD conducted the  
397 experiments and analyzed the data. BG prepared the original draft of the manuscript with  
398 writing, reviewing, and editing from JG, SF, DMP and TD.

## 399 ACKNOWLEDGMENTS

400 This work was funded by grants from the Croatian Science Foundation under projects UIP-  
401 2020-02-7868, IP-2018-01-3105 and IP-11-2013-8607 and the Croatian National Monitoring  
402 Program (Project “Jadran”). We thank Margareta Buterer, Jasna Jakovčević, Paolo Krelja and  
403 the crew of the RV “Vila Velebita” for their help in sampling.

## 404 CONFLICT OF INTEREST

405 Authors declare no conflict of interest

## 406 DATA AVAILABILITY STATEMENT

407 The data used to create Figures can be found in Table S1.

## 408 ORCID

409 *Jelena Godrijan* <http://orcid.org/0000-0003-2586-0034>

410 *Sanja Frka* <https://orcid.org/0000-0002-9018-6165>

411 *Daniela Marić Pfannkuchen* <https://orcid.org/0000-0001-5938-4131>

412 *Tamara Djakovac* <https://orcid.org/0000-0002-9733-1812>

413 *Blaženka Gašparović* <https://orcid.org/0000-0001-5888-2139>

414

## 415 REFERENCES

416 Azam F., Fenchel T., Field J.G., Gray J.S., Meyerreil L.A., Thingstad F. (1983). The ecological  
417 role of water-column microbes in the sea. *Marine Ecology Progress Series*, 10, 257–263.  
418 doi: 10.3354/meps010257

419 Barbosa A.B., Domingues R.B., Galvão H.M. (2010). Environmental forcing of phytoplankton  
420 in a Mediterranean estuary (Gadiana Estuary, South-western Iberia): A decadal study of  
421 anthropogenic and climatic influences. *Estuaries and Coasts*, 33, 324–341. doi:  
422 10.1007/s12237-009-9200-x

423 Bi R., Ismar-Rebitz S.M.H., Sommer U., Zhang H., Zhao, M. (2020). Ocean-related global  
424 change alters lipid biomarker production in common marine phytoplankton,  
425 *Biogeosciences*, 17, 6287–6307. doi: 10.5194/bg-17-6287-2020

426 Bopp L., Aumont O., Cadule, P., Alvain, S. Gehlen M. (2005). Response of diatoms distribution  
427 to global warming and potential implications: A global model study. *Geophysical*  
428 *Research Letters*, 32, L19606. doi:10.1029/2005GL023653.

429 Boyce D.G., Lewis M.R., Worm B. (2010). Global phytoplankton decline over the past century.  
430 *Nature*, 466, 591–596. doi: 10.1038/nature09268

431 Brassell S., Eglinton G., Marlowe I., Pflaumann U., Sarnthein M. (1986). Molecular  
432 stratigraphy: a new tool for climatic assessment. *Nature*, 320, 129–133. doi:  
433 1038/320129a0

434 Brassell S.C. (1993). Application of biomarkers for delineating marine paleoclimatic  
435 fluctuations during the Pleistocene. In: M. H. Engel & S. A. Macko (Eds.), *Organic*  
436 *Geochemistry. Principles and Applications* (pp. 699-738). New York: Plenum Press.  
437 doi: 10.1007/978-1-4615-2890-6\_34

438 Buesseler K.O., Boyd P.W. (2009). Shedding light on processes that control particle export  
439 and flux attenuation in the twilight zone of the open ocean. *Limnol. Oceanogr. Methods*,  
440 54, 1210–1232. <https://doi.org/10.4319/lo.2009.54.4.1210>

441 Buesseler K.O., Boyd P.W., Black E.E., Siegel D.A. (2020). Metrics that matter for assessing  
442 the ocean biological carbon pump. *Proceedings of the National Academy of Sciences of*  
443 *the United States of America*, 117, 9679–9687. doi: 10.1073/pnas.1918114117

444 Cabrera-Brufau, M., Arin, L., Sala, M.M., Cermenó, P., Marrase, C. 2021. Diatom dominance  
445 enhances resistance of phytoplanktonic POM to mesopelagic microbial decomposition.  
446 *Frontiers in Marine Science*, 8, 683354. doi: 10.3389/fmars.2021.683354

447 Christodoulou S., Marty J.C., Miquel J.C., Volkman J.K., Rontani J.F. (2009). Use of lipids and

- 448 their degradation products as biomarkers for carbon cycling in the northwestern  
449 Mediterranean Sea. *Marine Chemistry* 113, 25-40. doi: 10.1016/j.marchem.2008.11.003
- 450 Chust G., Allen J.I., Bopp L., Schrum C., Holt J. et al. (2014). Biomass changes and trophic  
451 amplification of plankton in a warmer ocean. *Global Change Biology*, 20, 2124–2139. doi:  
452 10.1111/gcb.12562
- 453 Claustre H., Legendre L., Boyd P.W., Levy M. (2021). The Oceans' biological carbon pumps:  
454 Framework for a research observational community approach. *Frontiers in Marine*  
455 *Science*, 8, 780052. doi: 10.3389/fmars.2021.780052
- 456 DeVries T., Primeau F., Deutsch C. (2012). The sequestration efficiency of the biological pump.  
457 *Geophysical Research Letters*, 39, L13601. doi: 10.1029/2012GL051963
- 458 Dodson V.J., Mouget J.L., Dahmen J.L., Leblond J.D. (2014). The long and short of it:  
459 temperature-dependent modifications of fatty acid chain length and unsaturation in the  
460 galactolipid profiles of the diatoms *Haslea ostrearia* and *Phaeodactylum tricornutum*.  
461 *Hydrobiologia*, 727, 95-107. doi: 10.1007/s10750-013-1790-4
- 462 Fernández E., Balch W.M., Marañón E., Holligan P.M. (1994). High rates of lipid biosynthesis  
463 in cultured, mesocosm and coastal populations of the coccolithophore *Emiliania huxleyi*.  
464 *Marine Ecology Progress Series*, 114, 13-22. doi: 10.3354/meps114013
- 465 Fernández E., Marañón E., Harbour D.S., Pingree, R.D. (1994b). Phytoplankton carbon  
466 incorporation patterns and biochemical composition of particulate matter in the eastern  
467 North Atlantic subtropical region. *Journal of Plankton Research*, 16, 1627- 1644. doi:  
468 10.1093/plankt/16.12.1627
- 469 Flanjak L., Vrana I., Cvitešić Kušan A., Godrijan Novak T., Penezić A., Gašparović B. 2022.  
470 The effects of high temperatures and nitrogen availability on the growth and composition  
471 of the marine diatom *Chaetoceros pseudocurvisetus*. *Journal of Experimental Botany*, 73,  
472 4250-4265. doi: 10.1093/jxb/erac145
- 473 Frada M. J., Keuter S., Koplovitz G., Avrahami Y. (2022). Divergent fate of coccolithophores  
474 in a warming tropical ecosystem. *Global Change Biology*, 28, 1560-1568. doi:  
475 10.1111/gcb.16007
- 476 Friedlingstein P., O'Sullivan M., Jones, M.W., Andrew R.M., Gregor L., et al. (2022). Global  
477 carbon budget 2022. *Earth System Science Data*, 14, 4811-4900. doi: 10.5194/essd-14-  
478 4811-2022
- 479 Gašparović B., Frka S., Koch, B.P., Zhu Z.Y., Bracher A., et al. (2014). Factors influencing  
480 particulate lipid production in the East Atlantic Ocean. *Deep-Sea Research Part I*, 89, 56-  
481 67. doi: 10.1016/j.dsr.2014.04.005
- 482 Gašparović B, Kazazić SP, Cvitešić A, Penezić A, Frka S. (2015). Improved separation and  
483 analysis of glycolipids by Iatrosan thin-layer chromatography-flame ionization detection.  
484 *Journal of Chromatography A*, 1409:259–267. doi: 10.1016/j.chroma.2015.07.047
- 485 Gašparović B., Penezić A., Lampitt R.S., Sudasinghe N., Schaub T. (2016). Free fatty acids,  
486 tri-, di- and monoacylglycerol production and depth-related cycling in the Northeast  
487 Atlantic. *Marine Chemistry*, 186, 101–109. doi: 10.1016/j.marchem.2016.09.002
- 488 Gašparović B, Kazazić SP, Cvitešić A, Penezić A, Frka S (2017). Corrigendum to “Improved  
489 separation and analysis of glycolipids by Iatrosan thin-layer chromatography–flame  
490 ionization detection” [*J. Chromatogr. A* 1409 (2015) 259–267]. *Journal of*  
491 *Chromatography A*, 1521:168–169. doi: 10.1016/J.CHROMA.2017.09.038

- 492 Goutx M., Guigue C., Striby L. (2003). Triacylglycerol biodegradation experiment in marine  
493 environmental conditions, definition of a new lipolysis index. *Organic Geochemistry*, 34,  
494 1465–1473. doi: 10.1016/S0146-6380(03)00119-0
- 495 Gregg W.W., Rousseaux, C.S. (2019). Global ocean primary production trends in the modern  
496 ocean color satellite record (1998–2015). *Environmental Research Letters*, 14, 124011.  
497 doi: 10.1088/1748-9326/ab4667
- 498 Grosse J., Brussaard C.P.D., Boschker H.T.S. (2019). Nutrient limitation driven dynamics of  
499 amino acids and fatty acids in coastal phytoplankton. *Limnology and Oceanography*, 64,  
500 302–316. doi: 10.1002/lno.11040
- 501 Guschina, I.A., Harwood, J.L. (2009). Algal lipids and effect of the environment on their  
502 biochemistry. In: M.T. Arts, M.J. Kainz, & M.T. Brett (Eds.), *Lipids in Aquatic Ecosystems*  
503 (pp. 1–24). New York: Springer. doi: 10.1007/978-0-387-89366-2
- 504 Hasle G.R. 1978. The inverted-microscope method, p. 88–96. In A. Sournia [ed.],  
505 *Phytoplankton Manual. Monographs on Oceanographic Methodology*. UNESCO.
- 506 Hedges J.I., Baldock J.A., Géinas Y., Lee C., Peterson M., Wakeham S.G. (2001). Evidence for  
507 non-selective preservation of organic matter in sinking marine particles. *Nature*, 409, 801–  
508 804. doi: 10.1038/35057247
- 509 Heinze C., Meyer S., Goris N., Anderson L., Steinfeldt R., et al. (2015). The ocean carbon sink  
510 – impacts, vulnerabilities and challenges. *Earth System Dynamics*, 6, 327-358. doi:  
511 10.5194/esd-6-327-2015
- 512 Hixson S.M, Arts M.T. (2016). Climate warming is predicted to reduce omega-3 long-chain,  
513 polyunsaturated fatty acid production in phytoplankton. *Global Change Biology*, 22, 2744–  
514 2755. doi: 10.1111/gcb.13295
- 515 IPCC Special Report on the Ocean and Cryosphere in a Changing Climate (2019). Bindoff N.L.,  
516 Cheung W.W.L., Kairo J.G. et al.: *Changing Ocean, Marine Ecosystems, and Dependent*  
517 *Communities*. In: Pörtner H-O, Roberts DC, Masson-Delmotte V et al., eds.
- 518 Ivančić I., Godrijan J., Pfannkuchen Marić D., Gašparović B., Đakovac T., Najdek M., 2012.  
519 Survival mechanisms of phytoplankton in conditions of stratification induced deprivation  
520 of orthophosphate: Northern Adriatic case study. *Limnology and Oceanography*, 57, 1721-  
521 1731. doi: 10.4319/lo.2012.57.6.1721
- 522 Jensen LO., Mousing EA., Richardson K. (2017). Using species distribution modelling to  
523 predict future distributions of phytoplankton: Case study using species important for the  
524 biological pump. *Marine Ecology - an Evolutionary Perspective* 38, e12427. doi:  
525 10.1111/maec.12427
- 526 Jiang X., Li H., Tong S., Gao K. (2022). Nitrogen limitation enhanced calcification and sinking  
527 rate in the coccolithophorid *Gephyrocapsa oceanica* along with its growth being reduced.  
528 *Frontiers in Marine Science*, 9:834358. doi: 10.3389/fmars.2022.834358
- 529 Kamburska L., Fonda-Umani S. (2009). From seasonal to decadal inter-annual variability of  
530 mesozooplankton biomass in the northern Adriatic Sea (Gulf of Trieste). *Journal of Marine*  
531 *Systems*. 78, 490 504. doi: 10.1016/j.jmarsys.2008.12.007
- 532 La Ferla, R., Azzaro, F., Azzaro, M., Caruso, G., Decembrini, F., et al. (2005). Microbial  
533 contribution to carbon biogeochemistry in the central Mediterranean Sea: variability of  
534 activities and biomass. *Journal of Marine Systems*, 57, 146–166.  
535 doi:10.1016/j.jmarsys.2005.05.001

- 536 Lønborg C., Carreira C., Jickells T., Álvarez-Salgado X.A. (2020). Impacts of global change  
537 on ocean dissolved organic carbon (DOC) cycling. *Frontiers in Marine Science*, 7, 466. doi:  
538 10.3389/fmars.2020.00466
- 539 Mayzaud P., Boutoute M., Gasparini S. Mousseau L. (2014). Lipids and fatty acid composition  
540 of particulate matter in the North Atlantic: importance of spatial heterogeneity, season and  
541 community structure. *Marine Biology*, 161, 1951–1971. [https://doi.org/10.1007/s00227-](https://doi.org/10.1007/s00227-014-2476-9)  
542 014-2476-9
- 543 Marinov I., Doney S.C., Lima I.D. (2010). Response of ocean phytoplankton community  
544 structure to climate change over the 21st century: partitioning the effects of nutrients,  
545 temperature and light. *Biogeosciences*, 7, 3941–3959. doi: 10.5194/bg7-3941-2010, 2010
- 546 Mishra R.K., Jena B., Venkataramana V., Sreerag A., Soares M.A., AnilKumar N. (2022).  
547 Decadal changes in global phytoplankton compositions influenced by biogeochemical  
548 variables. *Environmental Research*, 206, 112546. doi: 10.1016/j.envres.2021.112546
- 549 Moran M.A., Ferrer-González F.X., Fu H., Nowinski B., Olofsson M., et al. (2022). The  
550 Ocean's labile DOC supply chain. *Limnology and Oceanography*, 67, 1007-1021. doi:  
551 10.1002/lno.12053
- 552 Novak T., Godrijan G., Marić Pfannkuchen D., Djakovac T., Mlakar M., et al. (2018). Enhanced  
553 dissolved lipid production as a response to the sea surface warming. *Journal of Marine*  
554 *Systems*, 180, 289–298. doi: 10.1016/j.jmarsys.2018.01.006
- 555 Novak T., Godrijan J., Marić Pfannkuchen D., Djakovac T., Medić N., et al. (2019). Global  
556 warming and oligotrophication lead to increased lipid production in marine phytoplankton.  
557 *Science of the Total Environment*, 668, 171–183. doi: 10.1016/j.scitotenv.2019.02.372
- 558 O'Brien C.J., Peloquin J.A., Vogt M., Heinle M., Gruber N., et al., (2013). Global marine  
559 plankton functional type biomass distributions: coccolithophores. *Earth System Science*  
560 *Data*, 5, 259–276. doi: 10.5194/essd-5-259-2013
- 561 Pantorno A., Holland D.P., Stojkovic S., Beardall J. (2013). Impacts of nitrogen limitation on  
562 the sinking rate of the coccolithophorid *Emiliania huxleyi* (Prymnesiophyceae). *Phycologia*  
563 52, 288–294. doi: 10.2216/12- 064.1
- 564 Parsons, T.R., Maita, Y., Lalli, C.M. (1984). A manual of chemical and biological methods for  
565 seawater analysis. Toronto, Pergamon Press. Doi: 10.1016/C2009-0-07774-5
- 566 Raja M., Rosell-Melé A. (2021). Appraisal of sedimentary alkenones for the quantitative  
567 reconstruction of phytoplankton biomass. *Proceedings of the National Academy of*  
568 *Sciences of the United States of America*, 118, e2014787118. doi:  
569 10.1073/pnas.2014787118
- 570 Rivero-Calle S., Gnanadesikan A., Del Castillo C.E., Balch W.M., Guikema, S.D. (2015).  
571 Multidecadal increase in North Atlantic coccolithophores and the potential role of rising  
572 CO<sub>2</sub>. *Science*, 350, 1533-1537. doi: 10.1126/science.aaa8026
- 573 Rontani J.-F. (2008). Photooxidative and autoxidative degradation of lipid components during  
574 the senescence of phototrophic organisms. In: Matsumoto, T. (Ed.), *Phytochemistry*  
575 *Research Progress*. Nova Science Publishers, pp. 115–144.
- 576 Rontani J.-F., Zabeti N., Wakeham S.G. (2009). The fate of marine lipids: Biotic vs. abiotic  
577 degradation of particulate sterols and alkenones in the Northwestern Mediterranean Sea.  
578 *Marine Chemistry*, 113, 9-18. doi: 10.1016/j.marchem.2008.11.001

- 579 Rontani J.-F., Koblížek M. (2008). Regiospecific enzymatic oxygenation of cis-vaccenic acid  
580 in the marine phototrophic bacterium *Erythrobacter* sp strain MG3. *Lipids*, 43, 1065–  
581 1074. doi: 10.1007/s11745-008-3237-7
- 582 Sawada, K., Shiraiwa, Y. (2004). Alkenone and alkenoic acid compositions of the membrane  
583 fractions of *Emiliana huxleyi*. *Phytochemistry* 65, 1299–1307. doi:  
584 10.1016/j.phytochem.2004.03.015
- 585 Schulte S., Rostek F., Bard E., Rullkötter J., Marchal O. (1999). Variations of oxygen-minimum  
586 and primary productivity recorded in sediments of the Arabian Sea. *Earth and Planetary  
587 Science Letters*, 173, 205-221. doi: 10.1016/S0012-821X(99)00232-0
- 588 Seymour J.R., Amin S.A., Raina J.-B., Stocker R. (2017). Zooming in on the phycosphere: the  
589 ecological interface for phytoplankton–bacteria relationships. *Nature Microbiology*, 2,  
590 17065. doi: 10.1038/nmicrobiol.2017.65
- 591 Shin K.H., Hama T., Handa N. (2003). Effect of nutrient conditions on the composition of  
592 photosynthetic products in the East China Sea and surrounding waters. *Deep-Sea Research  
593 II*, 50, 389-401. doi: 10.1016/S0967-0645(02)00463-0
- 594 Sugimura, Y., Suzuki, Y. (1988). A high-temperature catalytic method for the determination of  
595 non-volatile dissolved organic carbon in seawater by direct injection of a liquid sample.  
596 *Marine Chemistry* 24, 105-131. doi: 10.1016/0304-4203(88)90043-6
- 597 Volkman J.K., Barrerr S.M., Blackburn S.I., Sikes E.L. (1995). Alkenones in *Gephyrocapsa*  
598 *oceanica*: Implications for studies of paleoclimate. *Geochimica et Cosmochimica Acta*, 59,  
599 513-520. doi: 10.1016/0016-7037(95)00325-T
- 600 Vrana I., Gašparović B., Geček S., Godrijan J., Novak T., et al (2022). Successful acclimation  
601 of marine diatoms *Chaetoceros curvisetus/pseudocurvisetus* to climate change. *Limnology  
602 and Oceanography*. Submitted.
- 603 Wang C., Wang J., Li L., Wang Y., Lin S. (2022). P-limitation promotes carbon accumulation  
604 and sinking of *Emiliana huxleyi* through transcriptomic reprogramming. *Frontiers in  
605 Marine Science*, 9. doi: 10.3389/fmars.2022.860222
- 606
